# Supplementary material for: A roll-to-roll welding process for planarized silver nanowire electrodes
Source: Royal Society of Chemistry journal article supplement (doi:10.1039/c4nr03771e), 2014-01-01
Supplement: c4nr03771e1.pdf [file c4nr03771e1.pdf]

## Supporting Information

### Roll-to-roll Welding Process for Planarized Silver Nanowire Electrodes

Seong Jun Lee, Young-Hoon Kim, Jung Kyu Kim, Hionsuck Baik, Jae Hoon Park, Jaeki Lee, Jaewook Nam, Jong Hyeok Park, Tae-Woo Lee, Gi-Ra Yi, \* Jeong Ho Cho\*

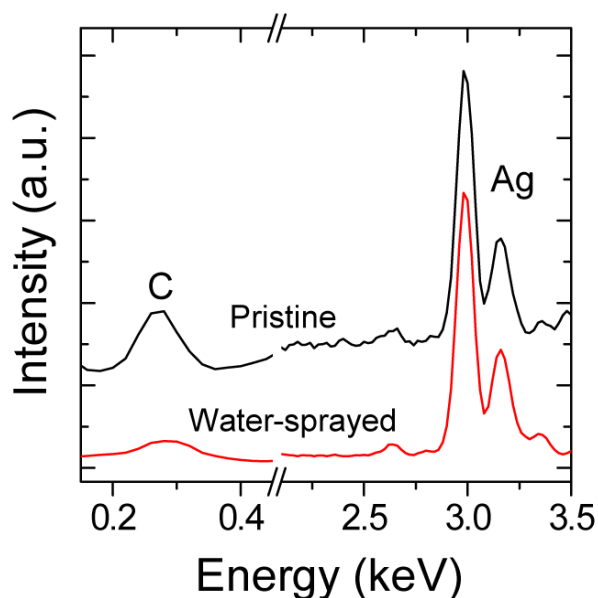

**Figure S1.** Energy-dispersive X-ray (EDX) spectra of the pristine and water-sprayed AgNWs films.

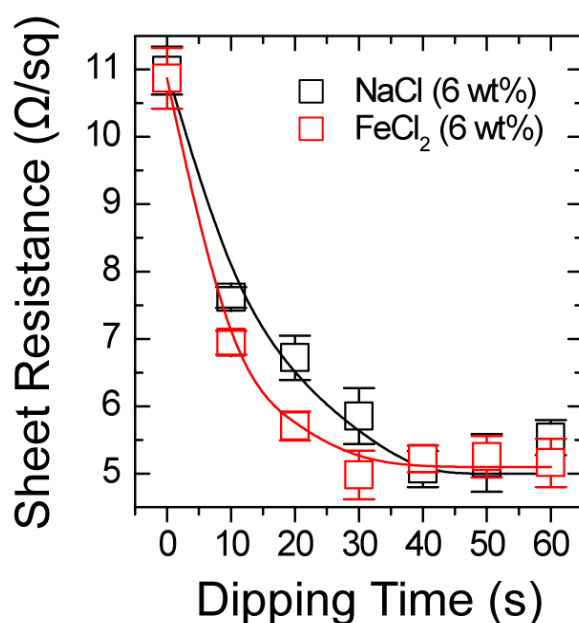

**Figure S2.** Changes in the sheet resistance of AgNWs film as a function of the dipping time in 6 wt% NaCl and FeCl<sub>2</sub> solutions.

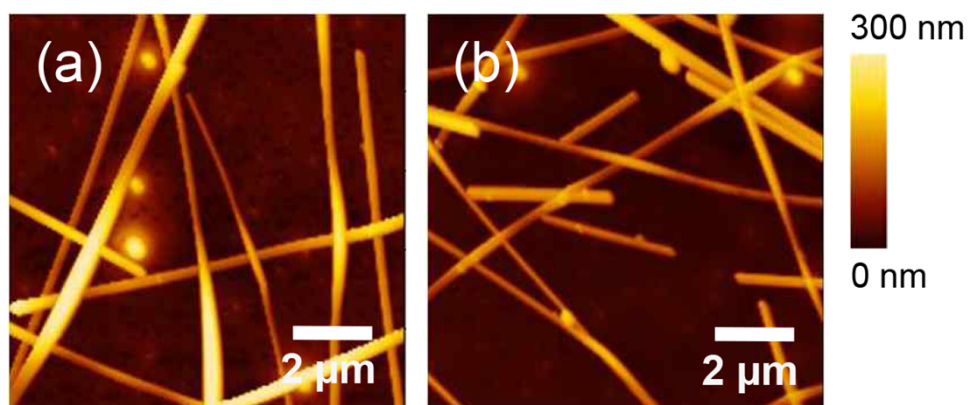

**Figure S3.** Atomic force microscopy (AFM) images of the AgNWs after (a) the Meyer rod coating and (b) the three steps.
